# Supplementary material for: A Robust Method for Sample Preparation of Gastrointestinal Stromal Tumour for LC/MS Untargeted Metabolomics
Source: MDPI journal article supplement (doi:10.3390/metabo11080554), 2021-08-21
Supplement: s1 [file s1]

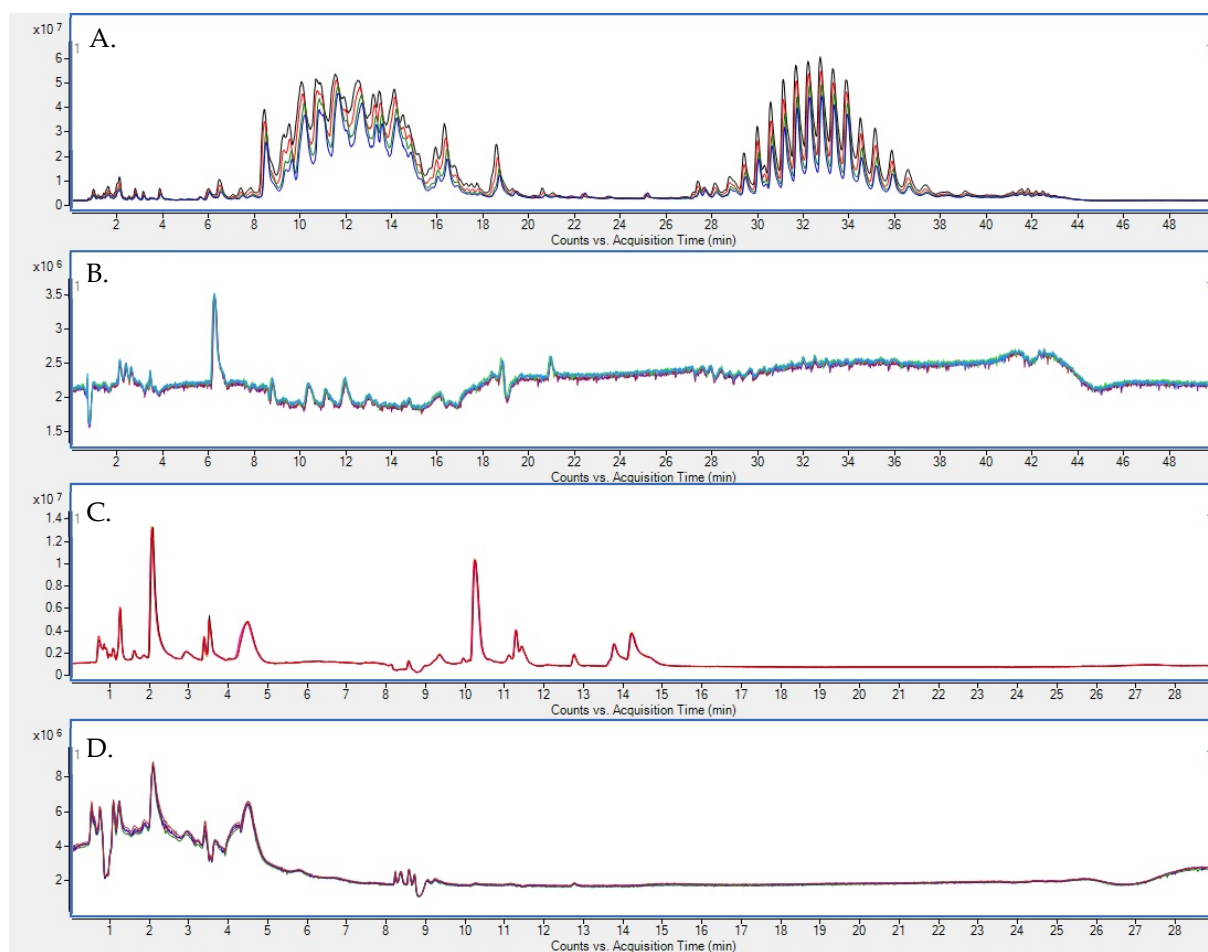

Figure S1. Chromatograms of four quality control samples analysed with the use of A) RP-LC-MS ESI (+), B) RP-LC-MS ESI (-), C) HILIC-LC-MS ESI (+), D) HILIC-LC-MS ESI (-).

Table S1. Mass spectrometer parameters during the analysis of lipid (RP) and polar (HILIC) extracts.

| <i>Parameter</i>          | <i>RP</i>       | <i>HILIC</i>    |
|---------------------------|-----------------|-----------------|
| <i>Gas temperature</i>    | <i>350 °C</i>   | <i>350 °C</i>   |
| <i>Gas flow</i>           | <i>10 l/min</i> | <i>11 l/min</i> |
| <i>Nebulizer pressure</i> | <i>45 psi</i>   | <i>45 psi</i>   |
| <i>Fragmentor voltage</i> | <i>175 V</i>    | <i>150 V</i>    |
| <i>Skimmer voltage</i>    | <i>65 V</i>     | <i>65 V</i>     |

Table S2. Comparison of extraction methods: the average number of extracted metabolites in three replicates, standard deviation, and number of metabolites common to all three replicates.

| Technique | Extraction method | Average number of extracted features | Standard deviation | Number of common features (3/3 replicates) | % of common features |
|-----------|-------------------|--------------------------------------|--------------------|--------------------------------------------|----------------------|
| RP-LC(+)  | Method A          | 3462                                 | 21                 | 3246                                       | 94%                  |
|           | Method B          | 3448                                 | 8                  | 3258                                       | 94%                  |
|           | Method C          | 3328                                 | 41                 | 3095                                       | 93%                  |
|           | Method D          | 3323                                 | 85                 | 2919                                       | 88%                  |
| RP-LC(-)  | Method A          | 796                                  | 17                 | 752                                        | 94%                  |
|           | Method B          | 793                                  | 7                  | 731                                        | 92%                  |
|           | Method C          | 766                                  | 16                 | 713                                        | 93%                  |
|           | Method D          | 809                                  | 14                 | 752                                        | 93%                  |
| HILIC(+)  | Method A          | 1062                                 | 5                  | 975                                        | 92%                  |
|           | Method B          | 850                                  | 14                 | 748                                        | 88%                  |
|           | Method C          | 889                                  | 31                 | 688                                        | 77%                  |
|           | Method D          | 773                                  | 88                 | 578                                        | 75%                  |
| HILIC(-)  | Method A          | 916                                  | 58                 | 812                                        | 89%                  |
|           | Method B          | 842                                  | 29                 | 760                                        | 90%                  |
|           | Method C          | 882                                  | 19                 | 748                                        | 85%                  |
|           | Method D          | 784                                  | 23                 | 615                                        | 78%                  |

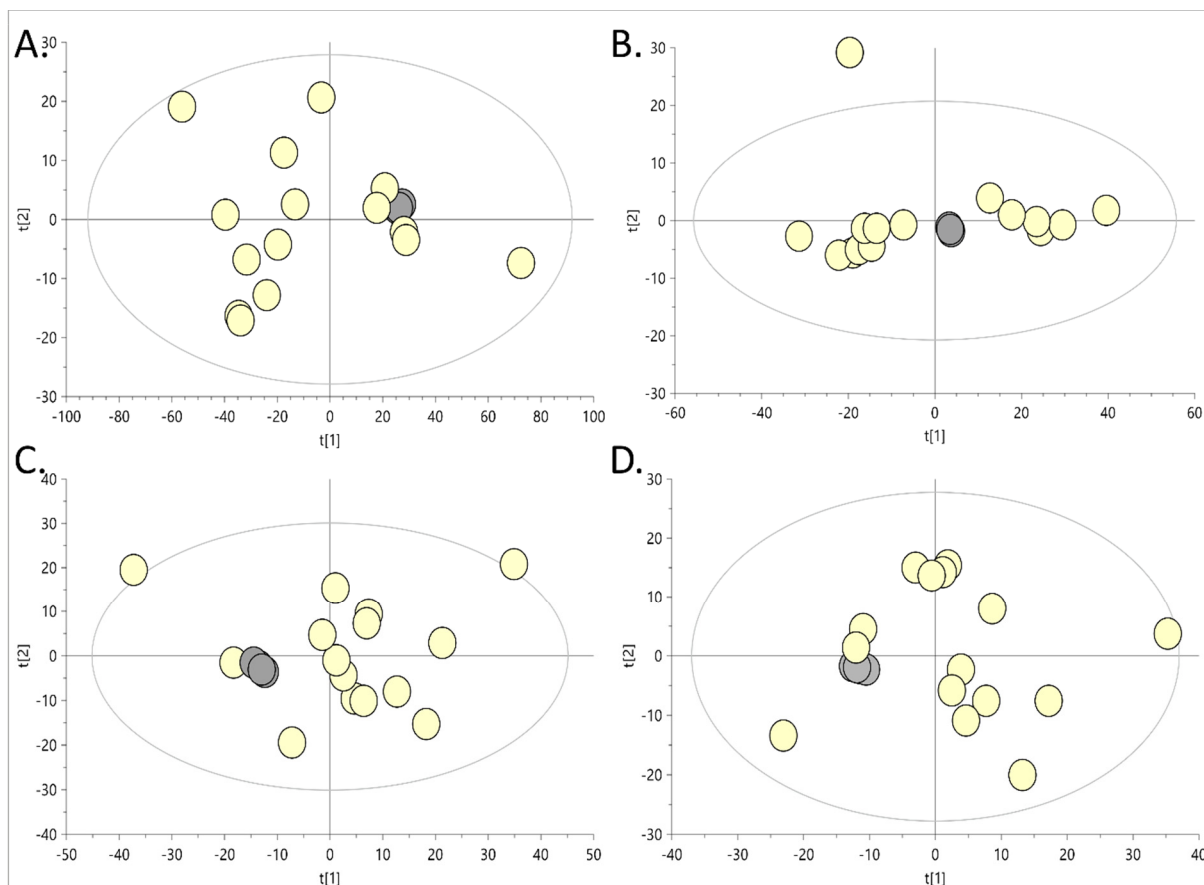

Figure S2. PCA models built on datasets obtained during robustness testing using the following techniques: (a) RP-LC-MS (+), (b) RP-LC-MS(-), (c) HILIC-LC-MS(+), (d) HILIC-LC-MS(-). Grey dots correspond to quality control samples while yellow dots represent experimental design samples.

Table S3. Parameters of hierarchical models developed for RP-LC-MS (+) robustness testing data, mean – mean coefficient sd – standard deviation of the coefficient, mad – median absolute deviation, q5 – 5 percentile, q95 – 95 percentile, rhat – rhat statistics.

| Factor                  | mean    | median  | sd       | mad      | q5      | q95     | rhat |
|-------------------------|---------|---------|----------|----------|---------|---------|------|
| Methanol volume         | 0.0166  | 0.0166  | 0.000864 | 0.000858 | 0.0152  | 0.018   | 1.01 |
| MTBE volume 1           | 0.0503  | 0.0502  | 0.000931 | 0.000916 | 0.0488  | 0.0518  | 1.02 |
| Vortex 1                | 0.0243  | 0.0243  | 0.000886 | 0.000903 | 0.0229  | 0.0258  | 1.04 |
| MTBE volume 2           | -0.087  | -0.087  | 0.00102  | 0.00102  | -0.0887 | -0.0854 | 1.01 |
| Water volume            | 0.0153  | 0.0153  | 0.000893 | 0.000898 | 0.0138  | 0.0167  | 1.01 |
| Vortex 2                | -0.0284 | -0.0284 | 0.000891 | 0.000905 | -0.0299 | -0.027  | 1.01 |
| Centrifugation time     | 0.038   | 0.0379  | 0.000879 | 0.00088  | 0.0366  | 0.0394  | 1.01 |
| Volume for evaporation  | -0.0318 | -0.0318 | 0.000838 | 0.000852 | -0.0331 | -0.0304 | 1.01 |
| Evaporation temperature | 0.0532  | 0.0532  | 0.000903 | 0.000888 | 0.0518  | 0.0548  | 1.02 |
| Solvent volume          | -0.0268 | -0.0267 | 0.000894 | 0.00088  | -0.0282 | -0.0253 | 1.02 |
| Dummy factor            | 0.0151  | 0.0151  | 0.000865 | 0.000825 | 0.0137  | 0.0165  | 1.01 |

Table S4. Parameters of hierarchical models developed for RP-LC-MS (-) robustness testing data, mean – mean coefficient sd – standard deviation of the coefficient, mad – median absolute deviation, q5 – 5 percentile, q95 – 95 percentile, rhat – rhat statistics.

| BETA                    | mean     | median   | sd      | mad     | q5        | q95      | rhat |
|-------------------------|----------|----------|---------|---------|-----------|----------|------|
| Methanol volume         | 0.0419   | 0.042    | 0.00126 | 0.00125 | 3.98E-02  | 0.044    | 1    |
| MTBE volume 1           | 0.0495   | 0.0495   | 0.00126 | 0.00126 | 4.74E-02  | 0.0515   | 1.01 |
| Vortex 1                | 0.000926 | 0.000916 | 0.00112 | 0.00113 | -9.37E-04 | 0.00273  | 1.01 |
| MTBE volume 2           | -0.0332  | -0.0332  | 0.00116 | 0.00113 | -3.50E-02 | -0.0312  | 1.01 |
| Water volume            | -0.00579 | -0.00583 | 0.00112 | 0.00111 | -7.60E-03 | -0.00394 | 1.01 |
| Vortex 2                | 0.00192  | 0.00193  | 0.0011  | 0.00103 | 1.11E-04  | 0.00377  | 1    |
| Centrifugation time     | 0.0154   | 0.0154   | 0.00112 | 0.00108 | 1.36E-02  | 0.0172   | 1    |
| Volume for evaporation  | 0.00472  | 0.00469  | 0.00113 | 0.00116 | 2.89E-03  | 0.00653  | 1.01 |
| Evaporation temperature | 0.046    | 0.046    | 0.00124 | 0.00117 | 4.39E-02  | 0.048    | 1    |
| Solvent volume          | -0.0212  | -0.0212  | 0.00114 | 0.00113 | -2.31E-02 | -0.0193  | 1    |
| Dummy factor            | 0.00312  | 0.00311  | 0.00111 | 0.00112 | 1.31E-03  | 0.00496  | 1.01 |

Table S5. Parameters of hierarchical models developed for HILIC-LC-MS (+) robustness testing data, mean – mean coefficient sd – standard deviation of the coefficient, mad – median absolute deviation, q5 – 5 percentile, q95 – 95 percentile, rhat – rhat statistics.

| BETA                    | mean      | median    | sd       | mad      | q5        | q95       | rhat |
|-------------------------|-----------|-----------|----------|----------|-----------|-----------|------|
| Methanol volume         | 3.38E-03  | 3.37E-03  | 5.97E-04 | 6.06E-04 | 2.41E-03  | 4.33E-03  | 1    |
| MTBE volume 1           | 2.63E-03  | 2.64E-03  | 5.96E-04 | 5.74E-04 | 1.68E-03  | 3.62E-03  | 1    |
| Vortex 1                | 7.04E-03  | 7.05E-03  | 6.18E-04 | 6.34E-04 | 6.04E-03  | 8.03E-03  | 1    |
| MTBE volume 2           | 6.81E-05  | 6.00E-05  | 6.32E-04 | 6.29E-04 | -9.61E-04 | 1.11E-03  | 1    |
| Water volume            | -2.82E-03 | -2.83E-03 | 6.10E-04 | 6.05E-04 | -3.80E-03 | -1.79E-03 | 1    |
| Vortex 2                | -7.19E-03 | -7.18E-03 | 5.95E-04 | 5.80E-04 | -8.18E-03 | -6.18E-03 | 1    |
| Centrifugation time     | -1.94E-03 | -1.93E-03 | 6.19E-04 | 6.25E-04 | -2.97E-03 | -9.57E-04 | 1    |
| Volume for evaporation  | 1.10E-02  | 1.10E-02  | 6.16E-04 | 6.06E-04 | 9.97E-03  | 1.20E-02  | 1    |
| Evaporation temperature | -5.39E-03 | -5.40E-03 | 6.32E-04 | 6.49E-04 | -6.40E-03 | -4.37E-03 | 1    |
| Solvent volume          | -1.00E-02 | -1.01E-02 | 6.28E-04 | 6.19E-04 | -1.11E-02 | -9.00E-03 | 1    |
| Dummy factor            | 2.89E-03  | 2.89E-03  | 5.88E-04 | 5.59E-04 | 1.89E-03  | 3.86E-03  | 1    |

Table S6. Parameters of hierarchical models developed for HILIC-LC-MS (-) robustness testing data, mean – mean coefficient sd – standard deviation of the coefficient, mad – median absolute deviation, q5 – 5 percentile, q95 – 95 percentile, rhat – rhat statistics.

| <b>BETA</b>             | mean     | median   | sd       | mad      | q5        | q95       | rhat |
|-------------------------|----------|----------|----------|----------|-----------|-----------|------|
| Methanol volume         | 0.00315  | 0.00315  | 5.74E-04 | 5.74E-04 | 2.21E-03  | 4.07E-03  | 1    |
| MTBE volume 1           | 0.00417  | 0.00417  | 5.68E-04 | 5.62E-04 | 3.26E-03  | 5.11E-03  | 1    |
| Vortex 1                | 0.00535  | 0.00534  | 5.77E-04 | 5.85E-04 | 4.38E-03  | 6.28E-03  | 1    |
| MTBE volume 2           | 0.00262  | 0.00262  | 5.99E-04 | 5.98E-04 | 1.64E-03  | 3.58E-03  | 1    |
| Water volume            | -0.00352 | -0.00352 | 5.64E-04 | 5.74E-04 | -4.46E-03 | -2.60E-03 | 1    |
| Vortex 2                | -0.00269 | -0.00269 | 6.00E-04 | 6.37E-04 | -3.65E-03 | -1.71E-03 | 1    |
| Centrifugation time     | -0.00185 | -0.00185 | 5.70E-04 | 5.70E-04 | -2.78E-03 | -9.01E-04 | 1    |
| Volume for evaporation  | 0.00987  | 0.00988  | 5.84E-04 | 5.87E-04 | 8.92E-03  | 1.08E-02  | 1    |
| Evaporation temperature | -0.00536 | -0.00535 | 5.88E-04 | 5.82E-04 | -6.35E-03 | -4.39E-03 | 1    |
| Solvent volume          | -0.011   | -0.011   | 5.77E-04 | 5.71E-04 | -1.19E-02 | -1.00E-02 | 1    |
| Dummy factor            | 0.000902 | 0.000894 | 5.51E-04 | 5.60E-04 | -1.47E-05 | 1.80E-03  | 1    |
